# Supplementary material for: An Indo-Pacific damselfish ( Neopomacentrus cyanomos ) in the Gulf of Mexico: origin and mode of introduction
Source: PeerJ journal article supplement (doi:10.7717/peerj.4328), 2018-02-07

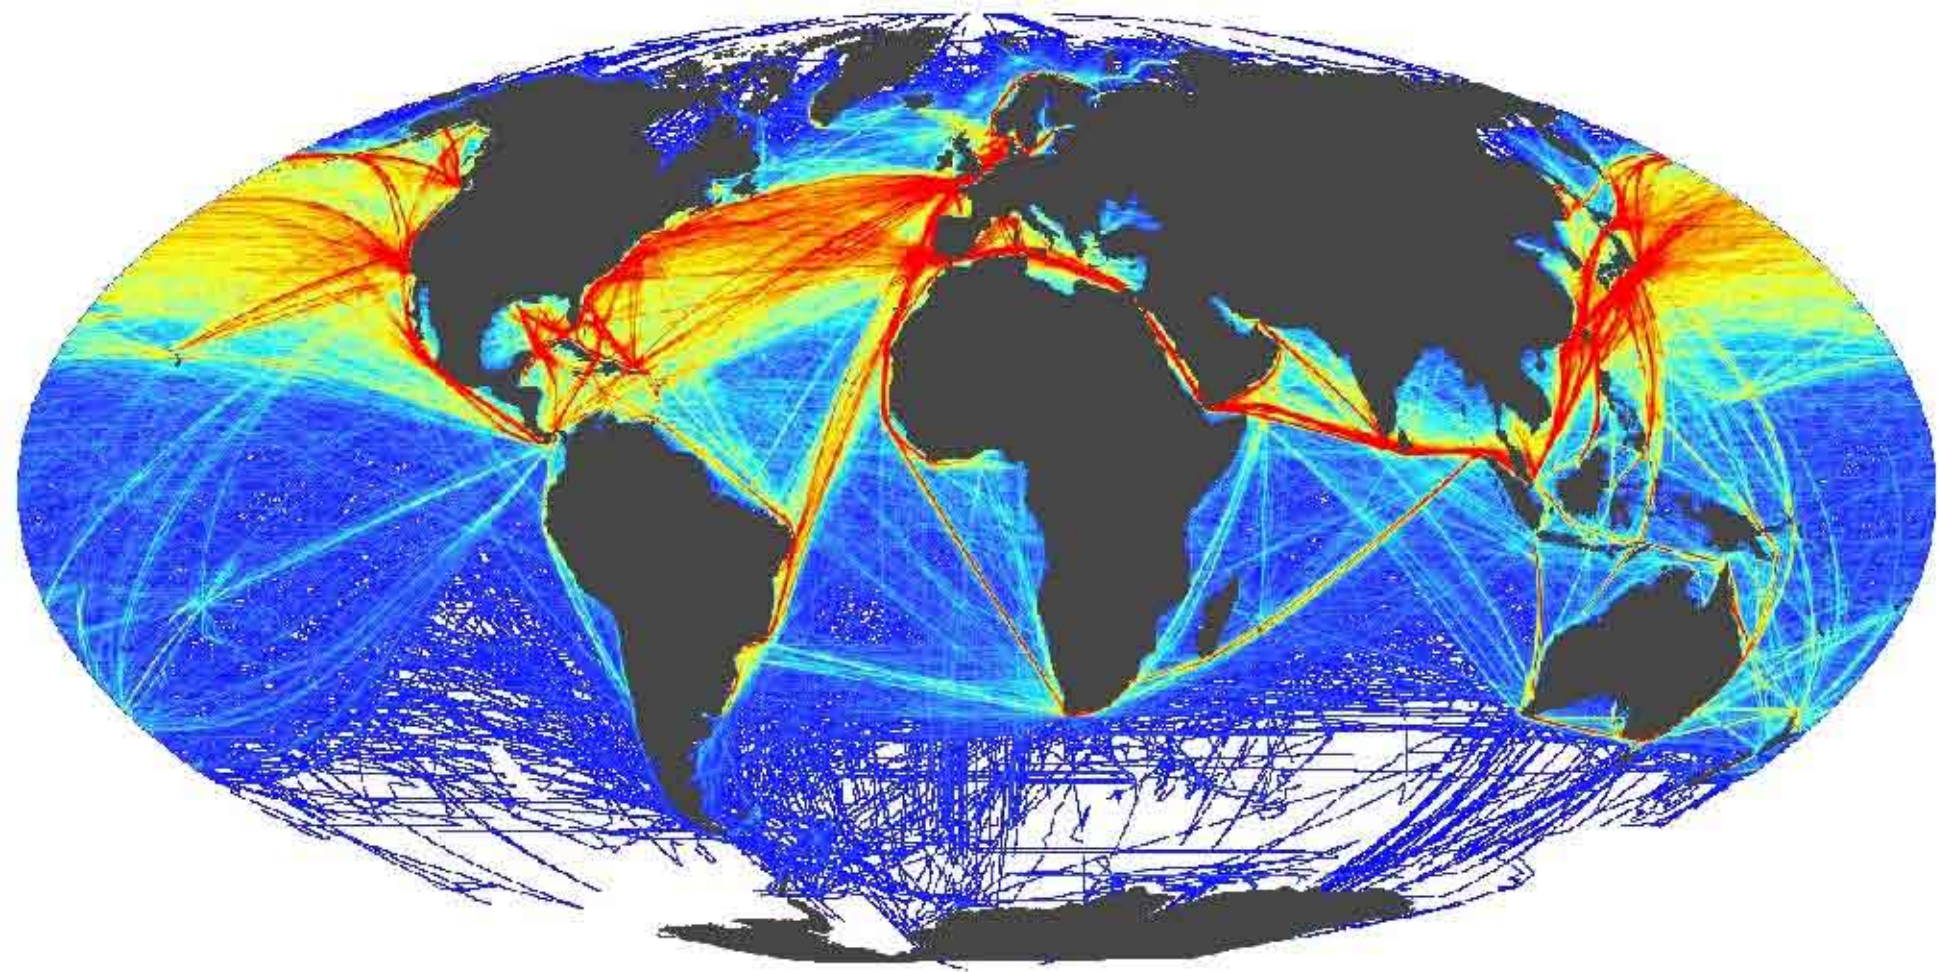

Supplement: Supplemental_Figure_S1.pdf [file Supplemental_Figure_S1.pdf]
